# Supplementary material for: Facile synthesis of Co2P2O7 nanorods as a promising pseudocapacitive material towards high-performance electrochemical capacitors
Source: Royal Society of Chemistry journal article supplement (doi:10.1039/c3ra41257a), 2013-01-01
Supplement: c3ra41257a.pdf [file c3ra41257a.pdf]

## Electronic Supplementary Information

---

### **Facile synthesis of $\text{Co}_2\text{P}_2\text{O}_7$ nanorods as a promising pseudocapacitive material towards high-performance electrochemical capacitors**

Linrui Hou,<sup>a,\*</sup> Lin Lian,<sup>a</sup> Diankai Li,<sup>a</sup> Jingdong Lin,<sup>b,\*</sup> Gang Pan,<sup>a,c</sup> Longhai Zhang,<sup>a</sup> Xiaogang Zhang,<sup>c</sup> Qingan Zhang<sup>a</sup> and Changzhou Yuan<sup>a,\*</sup>

<sup>a</sup> School of materials Science & Engineering, Anhui University of technology, Ma'anshan, 243002, P.R. China. E-mail:[houlr629@163.com](mailto:houlr629@163.com); [ayuancz@163.com](mailto:ayuancz@163.com)

<sup>b</sup> Department of Chemistry, College of Chemistry and Chemical Engineering, Xiamen University, Xiamen, 361005, P.R. China. E-mail:[jdlin@xmu.edu.sg](mailto:jdlin@xmu.edu.sg)

<sup>c</sup> College of Material Science and Engineering, Nanjing University of Aeronautics and Astronautics, Nanjing, 210016, P.R. China.

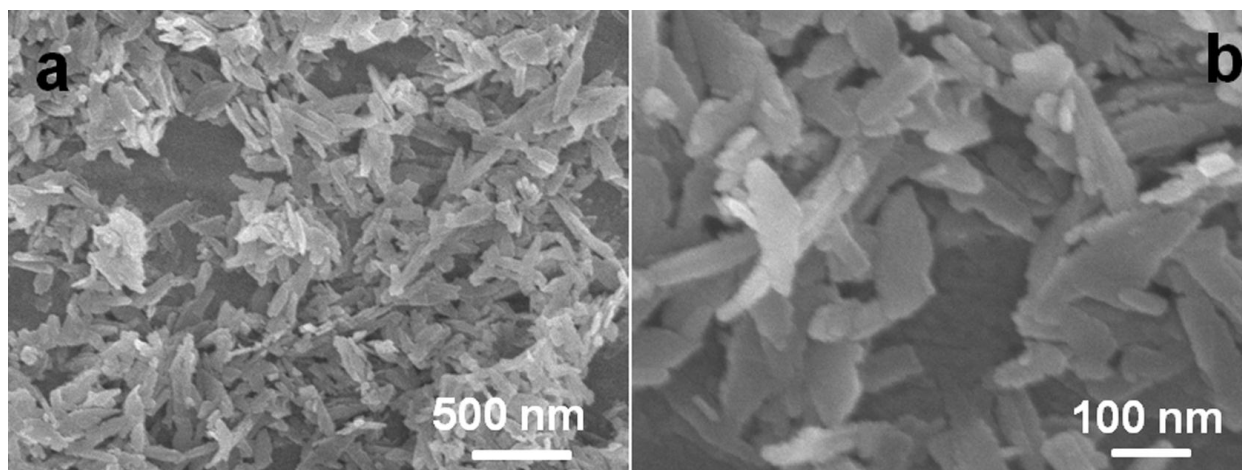

**Fig. S1** FESEM images with different magnifications of the  $\text{Co}_2\text{P}_2\text{O}_7$  nanosheets synthesized with the absence of  $\text{CH}_3\text{COONH}_4$

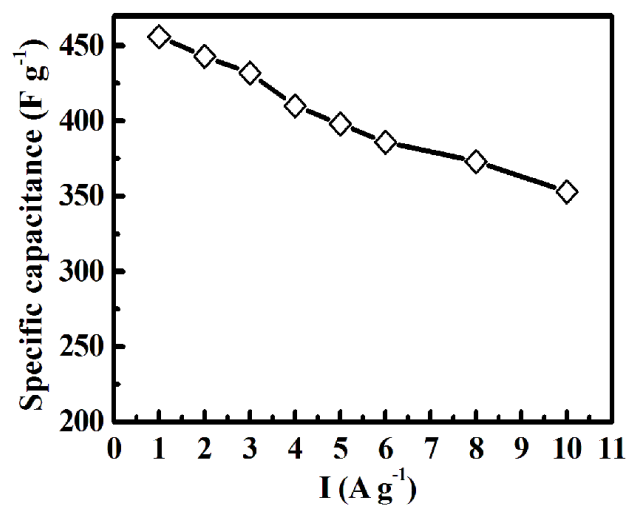

**Fig. S2** SCs as a function of current densities of the  $\text{Co}_2\text{P}_2\text{O}_7$  nanosheets synthesized with the absence of  $\text{CH}_3\text{COONH}_4$

The unique  $\text{Co}_2\text{P}_2\text{O}_7$  nanosheet electrode exhibits typical pseudocapacitances of 456, 443, 432, 410, 398, 386, 373 and 353  $\text{F g}^{-1}$  at current densities of 1, 2, 3, 4, 5, 6, 8 and 10  $\text{A g}^{-1}$ , respectively, which suggests that  $\sim 77\%$  of the SC is still retained when the charge-discharge rate is increased from 1 to 10  $\text{A g}^{-1}$ .
